# Supplementary material for: Experimentally-validated correlation analysis reveals new anaerobic methane oxidation partnerships with consortium-level heterogeneity in diazotrophy
Source: Springer Nature journal article supplement (doi:10.1038/s41396-020-00757-1), 2020-10-15
Supplement: MOESM9 [file 41396_2020_757_MOESM9_ESM.pdf]

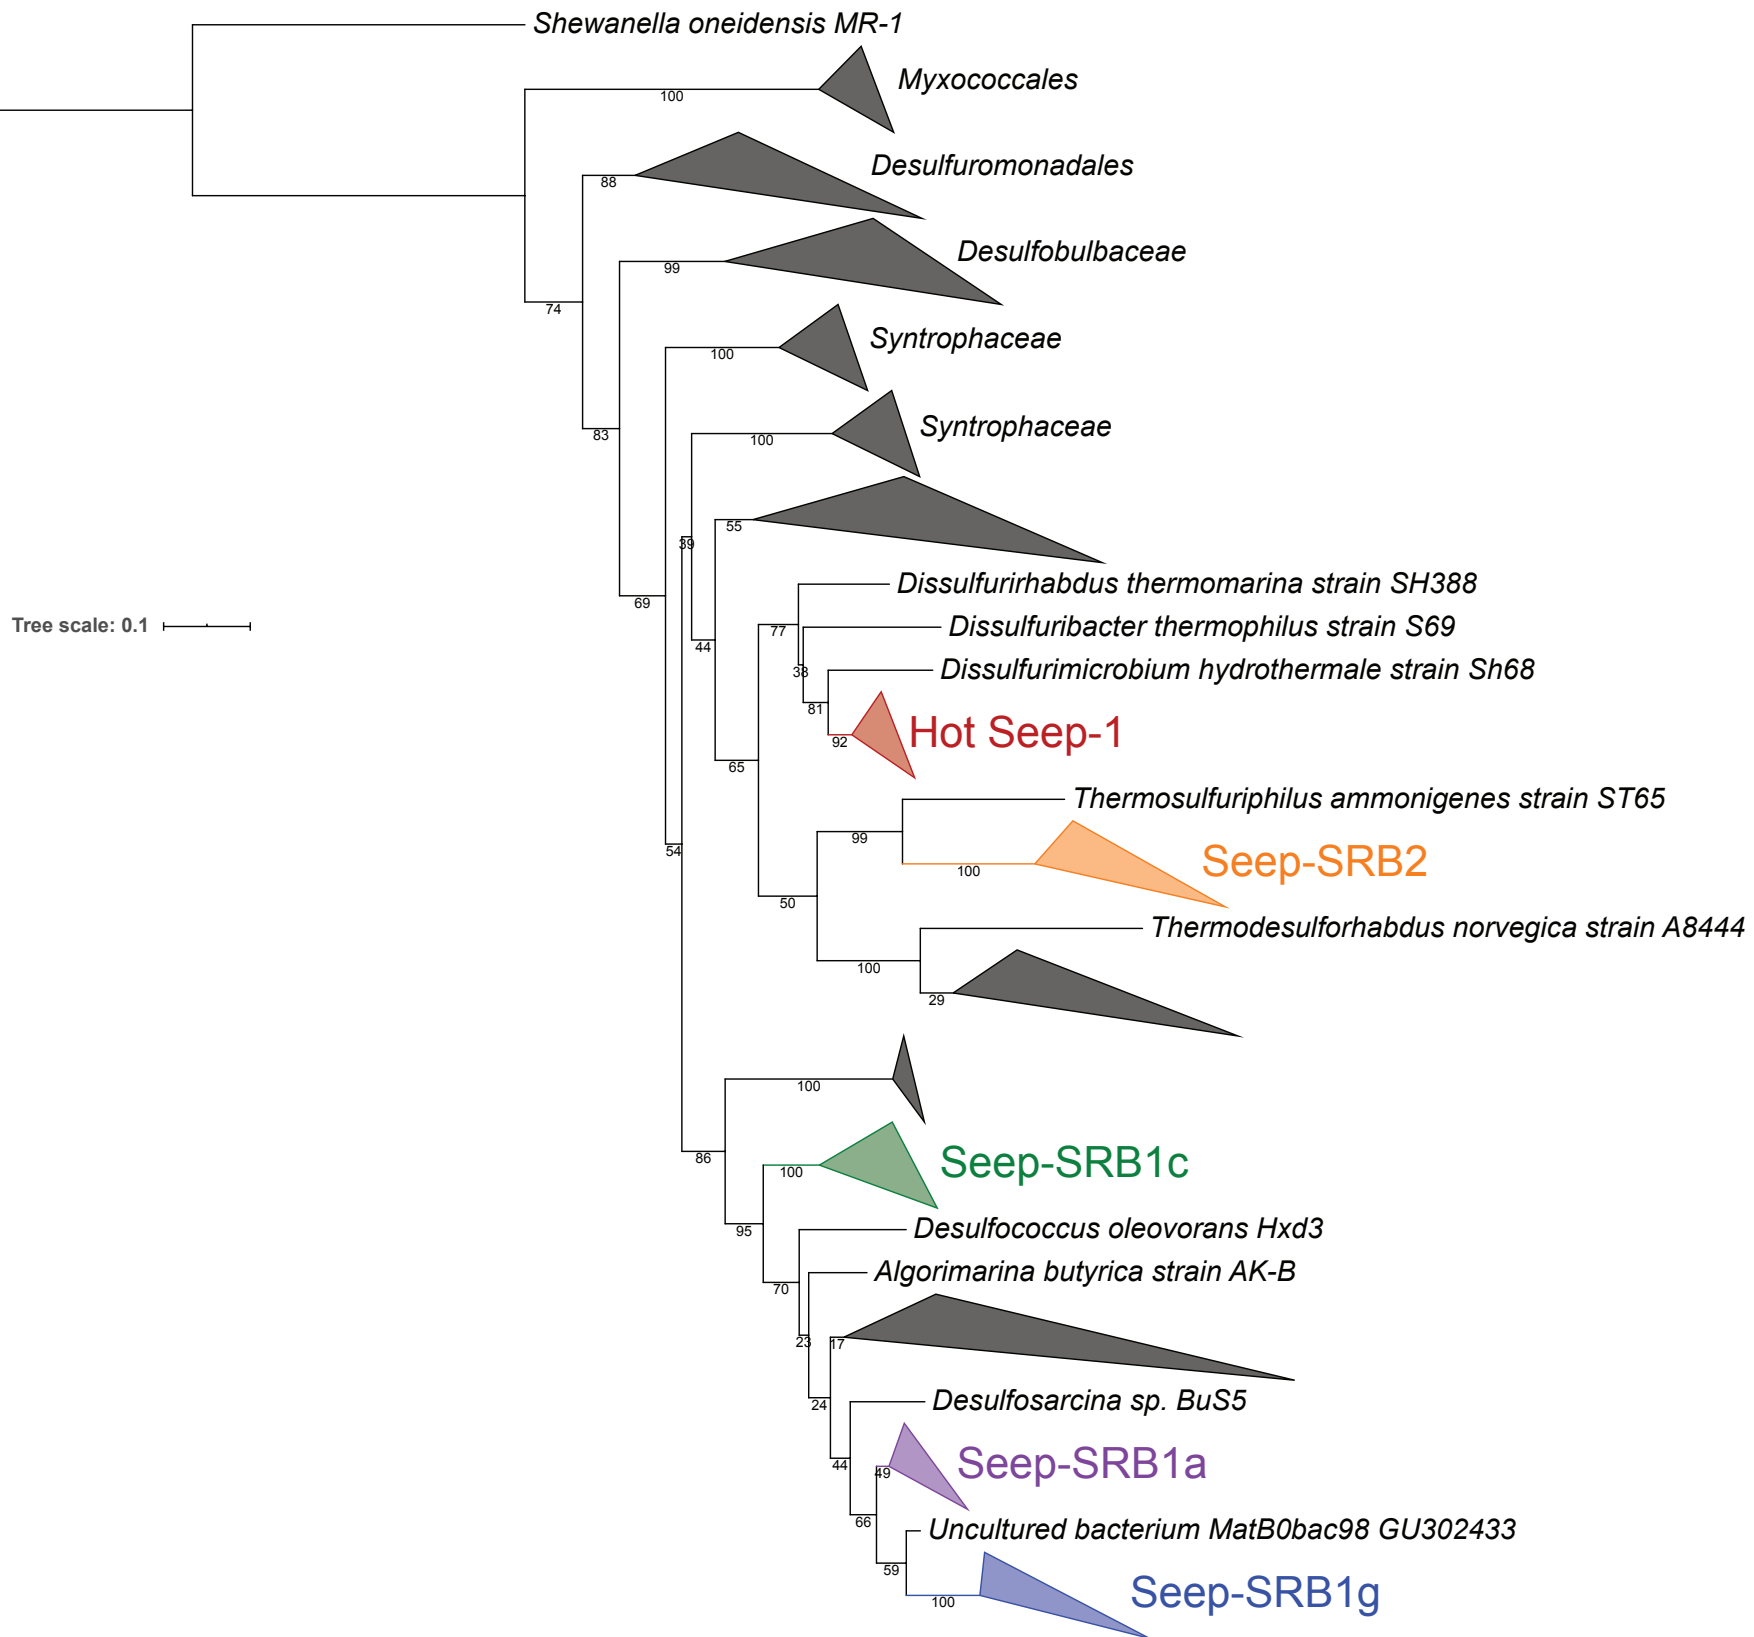

**Supplemental Figure 3.** 16S rRNA phylogeny inferred from maximum-likelihood methods using only full-length 16S rRNA sequences. Tree topology shown here is congruent with the phylogeny shown in Figure 3 constructed using a mix of shorter 16S rRNA amplicon and full-length 16S sequences.
